# Supplementary material
Source: publisher site journal article supplement (https://www.dovepress.com/article/265167)
Supplement: Supplementary file 1 [file get_supplementary_file.php]

**Table S1** TLC screening of the oleogum resin of *Boswellia carterii* Birdwood.

| Spot No. | Rf value | Color with Vanillin/ H2SO4 |
| --- | --- | --- |
| 1 | 0.43 | Faint brown |
| 2 | 0.33 | Purple |
| 3 | 0.71 | Orange red changing into purple |
| 4 | 0.7 | Orange red |
| 5 | 0.69 | Orange brown |
| 6 | 0.6 | Green |
| 7 | 0.5 | Brick-red |

Abbreviations: Rf, Retention factor

**Table S2** Column chromatographic separation of the resin of *Boswellia* *carterii* Birdwood.

| Fraction | Eluent  (Petroleum ether: Ethyl acetate) | TLC | | | |
| --- | --- | --- | --- | --- | --- |
| Number of Spots | Rf | Color with vanillin/  Sulfuric acid | Compound |
| 1-11 | 2.5 % | 2 | 0.95  0.75 | Purple | Poor yield |
| 11-40 | 5 % | 2 | 0.75  0.65 | Purple  Faint brown | Poor yield |
| 41-50 | 5 % | 3 | 0.65  0.55  0.48 | Faint brown | Poor yield |
| 51-70 | 5 % | 2 | 0.48  0.45 | Faint brown | Palmitic acid |
| 71-100 | 5 % | 2 | 0.35  0.33 | Purple | Lupeol |
| 101-130 | 5 % | 2 | 0.71  0.70 | Orange-red  Orange-brown | Acetyl- β -boswellic acid |
| 131-160 | 5 % | 2 | 0.71  0.70 | Orange-red  Orange-brown | Acetyl-α-boswellic acid |
| 161-190 | 8 % | 2 | 0.69  0.5 | Faint brown | 3-Oxo-tirucallic acid |
| 191-220 | 8 % | 3 | 0.6  0.5  0.4 | Green | Acetyl-11-keto- β -boswellic acid (AKBA) |
| 221-250 | 8 % | 2 | 0.6  0.5  0.4 | brick-Red | β-boswellic acid |
| 251-280 | 8 % | 2 | 0.4  0.37 | Faint brown | 3-hydroxy-tirucallic acid |
| 281-310 | 10 % | 2 | 0.4  0.37 | Faint brown | Poor yield |
| 311-340 | 10 % | 2 | 0.35,  0.29 | Green | 11-keto--boswellic acid |
| 341-370 | 10 % | 2 | 0.53,  0.31 | Faint brown | Poor yield |

Abbreviations: Rf, Retention factor

**Table S3** Determination of solubility of AKBA in different solvents.

| Solvent | Solubility (mg/ml) |
| --- | --- |
| Distilled water | 0.023 |
| Phosphate buffer solution (7.4) | 0.038 |
| Phosphate buffer solution (7.4) and 1%SLS | 0.169 |
| Ethanol | 5.22 |
| DMSO | 23.97 |

Abbreviations: SLS, Sodium lauryl sulphate; DMSO, Dimethyl sulfoxide

**Table S4**  1H-NMR and 13C-NMR spectral data for AKBA.

| Atom C/H | 1­H  (δ, ppm) (J,Hz) | 1­3C  (δ, ppm) | DEPT | Atom C/H | 1­H  (δ, ppm)  (J,Hz) | 1­3C  (δ, ppm) | DEPT |
| --- | --- | --- | --- | --- | --- | --- | --- |
| 1 | 2.53 dd,  (J=13.2,2) | 35.0 | CH2 | 17 | - | 34.2 | C |
| 2 | 1.56 m,  2.22 m | 23.9 | CH2 | 18 | 1.37 d  ( J=12.3) | 59.4 | CH |
| 3 | 5.28 t | 73.6 | CH | 19 | 1.52 m | 39.7 | CH |
| 4 | - | 46.7 | C | 20 | 1.39 m | 39.6 | CH |
| 5 | 1.38 dd,  (J=12,2) | 50.8 | CH | 21 | 1.01 dd  (J=11.8, 3) | 27.9 | CH2 |
| 6 | 1.75 m | 19.2 | CH2 | 22 | 1.29 m  1.46 m | 41.3 | CH2 |
| 7 | 1.43 m | 31.3 | CH2 | 23 | 1.21 s | 24.3 | CH3 |
| 8 | - | 43.9 | C | 24 | - | 182.2 | C |
| 9 | 2.39 s | 60.7 | CH | 25 | 1.12 s | 13.6 | CH3 |
| 10 | - | 37.6 | C | 26 | 1.17 s | 18.8 | CH3 |
| 11 | - | 199.6 | C | 27 | 1.33 s | 20.9 | CH3 |
| 12 | 5.54 s | 130.8 | CH | 28 | 0.93 s | 21.5 | CH3 |
| 13 | - | 165.3 | C | 29 | 0.78 d  ( J=6.3) | 17.8 | CH3 |
| 14 | - | 45.3 | C | 30 | 0.80 d  ( J=7.4) | 29.3 | CH3 |
| 15 | 1.66 m | 33.2 | CH2 | CH3CO | 2.07 s | 21.7 | CH3 |
| 16 | 1.88 m | 27.6 | CH2 | CH3CO | - | 170.5 | C |

Abbreviations: DEPT, Distortions enhancement by polarization

**Table S5** Output data of the 23 factorial design of AKBA-loaded SNVs.

| Responses | *R2* | | Adjusted *R2* | Predicted *R2* | | Adequate precision |
| --- | --- | --- | --- | --- | --- | --- |
| EE% (Y1) | | 0.9768 | 0.9593 | 0.9071 | 21.134 | |
| Q8h(Y2) | | 0.9644 | 0.9377 | 0.8577 | 13.399 | |
| PS (nm) (Y3) | | 0.9615 | 0.9326 | 0.8460 | 16.894 | |

| Regression equations of different responses in terms of coded factors  (3)  (4)  (5) |
| --- |

**Table S6** ANOVA for the 23 factorial design of AKBA-loaded SNVs.

| Indepndent variable | Source | Sum of squares | df | Mean square | F-value | P- value |
| --- | --- | --- | --- | --- | --- | --- |
| EE% (Y1)  Q8h (Y2) | Model  X1  X2  X3  Model  X1  X2  X3 | 823.86  118.54  153.78  551.54  3310.35  3057.39  9.93  243.04 | 3  1  1  1  3  1  1  1 | 274.62  118.54  153.78  551.54  1103.45  3057.39  9.93  243.04 | 56.07  24.20  31.40  112.60  36.14  100.15  0.33  7.96 | 0.0010  0.0079  0.0050  0.0004  0.0023  0.0006  0.5989  0.0478 |
| PS (Y3) | Model  X1  X2  X3 | 2189.53  979.03  326.40  884.10 | 3 111 | 729.84  979.03  326.40  884.10 | 33.30  44.67  14.89  40.34 | 0.0027  0.0026  0.0182  0.0031 |

Notes: Values of Prob>F" less than 0.05 indicate model terms are significant, X1: Ratio of Span 60 to Tween 80, X2: Rotation speed (rpm), X3: Sonication time (min)

Abbreviations: EE, entrapment efficiency; Q8h, drug released after 8h; PS, particle size; df, degree of freedom.


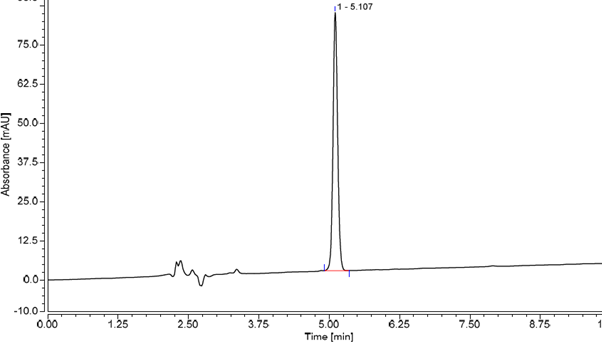


**Figure S1** HPLC chromatogram of AKBA

**
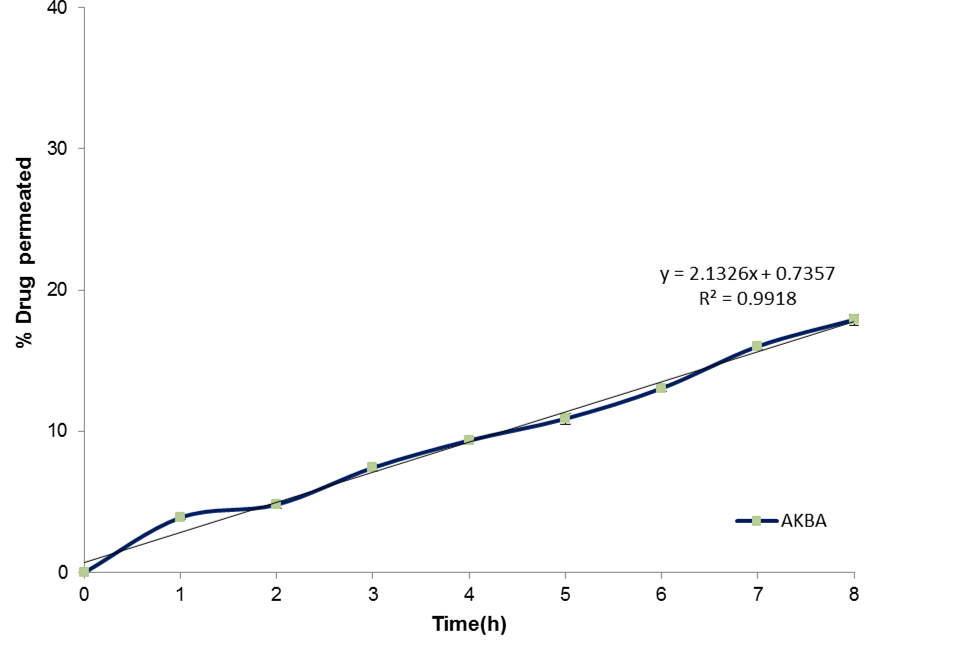
**

**Figure S2** Zero order kinetics graph of *ex vivo* permeation of AKBA dispersion


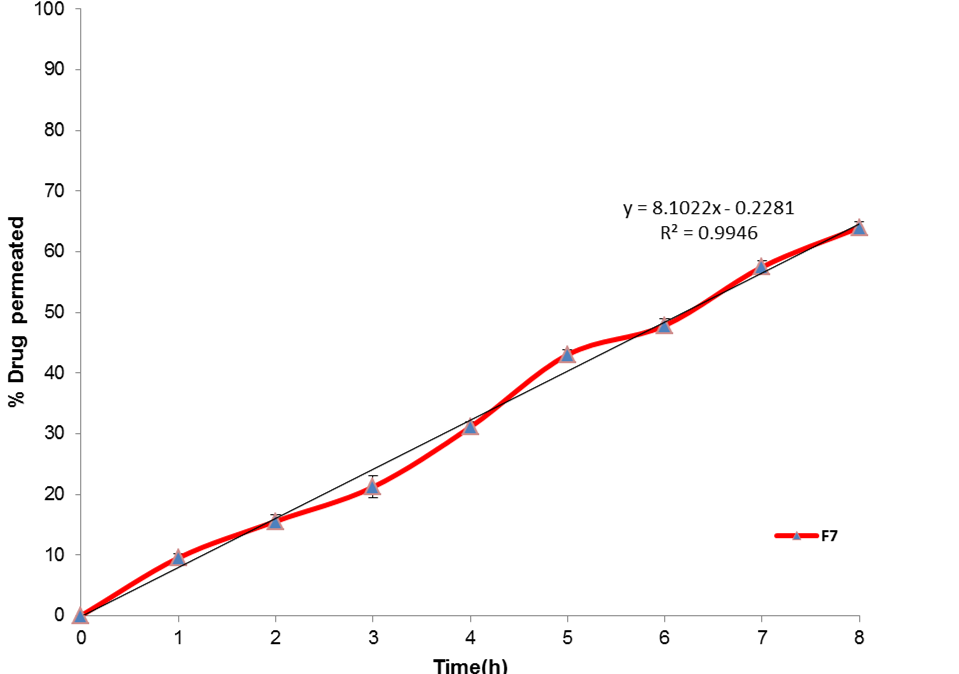


**Figure S3** Zero order kinetics graph of *ex vivo* permeation ‎ of F7
